# Supplementary material for: Bankrisico’s en toezicht
Source: Oxford University Press journal article supplement (doi:10.2337/dc12-2378), 2008-01-01
Supplement: dc122378supplementarydata.pdf [file dc122378supplementarydata.pdf]

# SUPPLEMENTARY DATA

**Supplementary Table 1.** Mean concentrations of biomarkers overtime in the entire cohort

|                                                           | <b>1<sup>st</sup> assessment<br/>Mean (st. error)</b> | <b>2<sup>nd</sup> assessment<br/>Mean (st. error)</b> | <b>3<sup>rd</sup> assessment<br/>Mean (st. error)</b> |
|-----------------------------------------------------------|-------------------------------------------------------|-------------------------------------------------------|-------------------------------------------------------|
| $\alpha$ -tocopherol (mg/L)                               | 8.66 (0.20)                                           | 9.62 (0.20)*                                          | 9.95 (0.20)*                                          |
| $\alpha$ -tocopherol per unit cholesterol                 | 0.0047 (0.0001)                                       | 0.0051 (0.0001)*                                      | 0.0052 (0.0001)*                                      |
| $\gamma$ -tocopherol (mg/L)                               | 2.25 (0.07)                                           | 2.35 (0.07)                                           | 2.18 (0.07)                                           |
| $\gamma$ -tocopherol per unit cholesterol                 | 0.0012 (0.00003)                                      | 0.0012 (0.00003)                                      | 0.0012 (0.00004)                                      |
| Urinary 15-isoprostane F <sub>2t</sub> (ng/mg creatinine) | 9.60 (0.28)                                           | 9.71 (0.28)                                           | 9.54 (0.29)                                           |

\* Significantly different from the first assessment after Bonferroni adjustment for multiple comparisons
